# Supplementary material
Source: PubMed Central journal article supplement (PMC6487460)
Supplement: oc8b00910_si_001.pdf [file oc8b00910_si_001.pdf]

# Redirecting Pore Assembly of Staphylococcal $\alpha$ -Hemolysin by Protein Engineering

## Supporting Information

Sunwoo Koo<sup>1\*</sup>, Stephen Cheley<sup>2§</sup>, Hagan Bayley<sup>3</sup>

<sup>1</sup> Department of Neuroscience and Experimental Therapeutics, Texas A&M University  
Health Science Center, Bryan, TX 77807, USA

<sup>2</sup> Department of Pharmacology, Alberta Diabetes Institute, University of Alberta, Edmonton, T6G  
2E1, Alberta, Canada

<sup>3</sup> Department of Chemistry, University of Oxford, OX1 3TA, England, UK

¶ This paper is dedicated to the memory of our wonderful colleague, Dr. Stephen Cheley, who passed away.

Corresponding Authors:

Sunwoo Koo, Ph.D.

Department of Neuroscience and Experimental Therapeutics

Texas A&M University HSC

8447 Riverside Parkway

Bryan, TX 77807, U.S.A.

swkoo@tamu.edu, 1-979-436-0381

Hagan Bayley, PhD.

Department of Chemistry, University of Oxford, Chemistry Research Laboratory

Mansfield Road, Oxford, OX1 3TA, England, UK

hagan.bayley@chem.ox.ac.uk, +44 1865 285101

**Table S1.** Binding efficacy toward RBCs, HL-60 cells and HT-1080 cells (%)

| Cell type     | rRBC  |       | hRBC  |       | HL-60 |       | HT-1080 |       |
|---------------|-------|-------|-------|-------|-------|-------|---------|-------|
|               | UB    | TB    | UB    | TB    | UB    | TB    | UB      | TB    |
| $\alpha$ HL   | 67.12 | 32.88 | 99.94 | 0.06  | 90.40 | 9.59  | 87.18   | 12.82 |
| $\alpha$ HLG1 | 24.38 | 75.62 | 37.45 | 62.55 | 57.05 | 42.95 | 58.43   | 41.57 |

UB: Unbound, OB: Oligomer Bound, TB: Total Bound protein (oligomer & monomer bound), UB + TB = 100 %

Band intensity was measured by ImageJ (NIH)

**Table S2.** Information of protease recognition domain

| Name of construct | Sequence          |
|-------------------|-------------------|
| RRHLG1            | TRR <u>IGGL</u> G |
| MMPHLG1           | <u>PLGL</u> AGGG  |

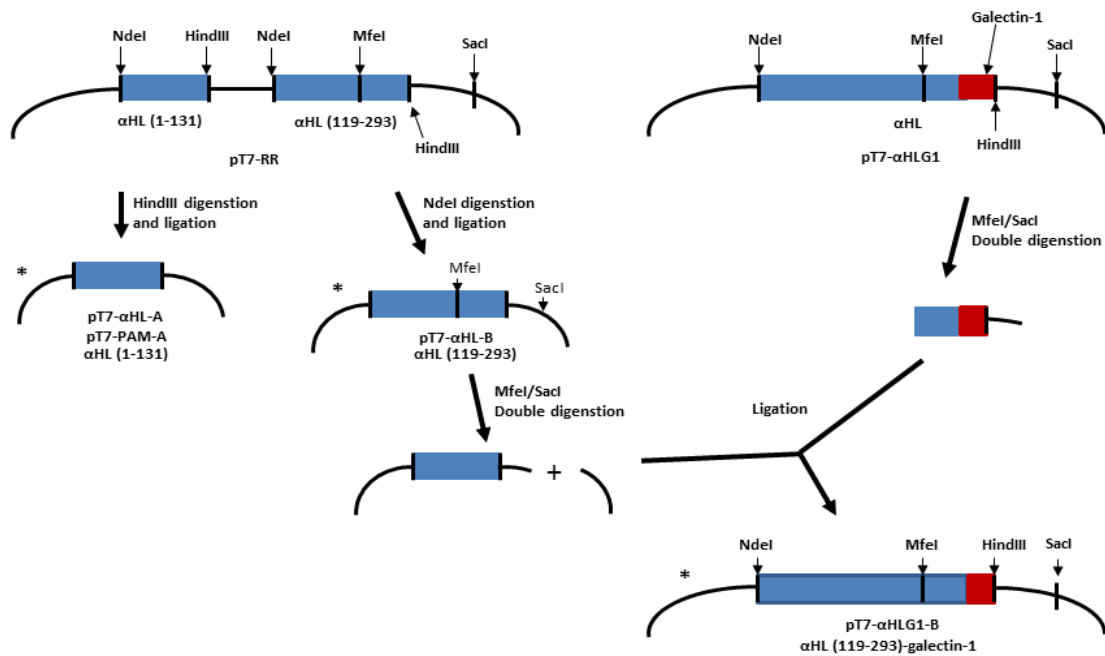

**Figure. S1.** Construction of PAM $\alpha$ HL and PAM $\alpha$ HLG1 (complimentary mutant of  $\alpha$ HLG1: 1-131 and 119-293-galectin-1, pT7: pT7 vector). pT7- $\alpha$ HL-A ( $\alpha$ HL, 1-131) and pT7- $\alpha$ HL-B ( $\alpha$ HL, 119-293) were prepared from pT7-RR by *HindIII* digestion reaction and *NdeI* digestion reaction respectively. pT7- $\alpha$ HLG1-B ( $\alpha$ HL 119-293 and galectin-1 chimera) was constructed by using oligos from pT7- $\alpha$ HLG1 and pT7- $\alpha$ HL-B. Products of double-digestion reaction of both vectors with *MfeI* and *SacI* were ligated to construct pT7- $\alpha$ HLG1-B.

\*pT7- $\alpha$ HL-A: PAM-A, pT7- $\alpha$ HL-B: PAM $\alpha$ HL-B, pT7- $\alpha$ HLG1-B: PAM $\alpha$ HLG1-B

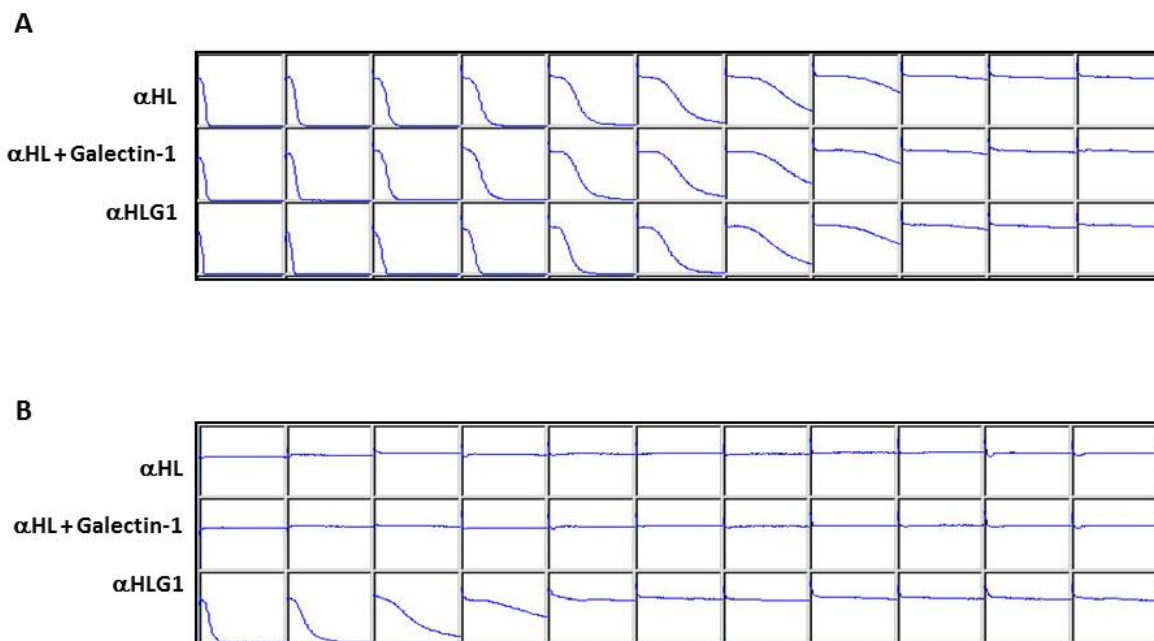

**Figure. S2.** Hemolysis assay of  $\alpha$ HL,  $\alpha$ HL + Galectin-1, and  $\alpha$ HLG1 (29 nM) to investigate the osmofragility of RBCs by galectin-1. Galectin-1 was added to MBSA buffer to make MBSA-galectin-1 (galectin-1, 29 nM final). 1% rRBC (A) and 1% hRBC (B) were prepared with MBSA-galectin-1.  $\alpha$ HL was diluted with MBSA buffer (29 nM final) in the first well of each row (100  $\mu$ l final volume), and then subjected to 2-fold serial dilution with the same buffer across each row, leaving 50  $\mu$ l in each well. The assay was initiated by the addition of 50  $\mu$ l RBC mix to each well and monitored by observing the decrease in light scattering at 595 nm with microplate reader (TECAN).

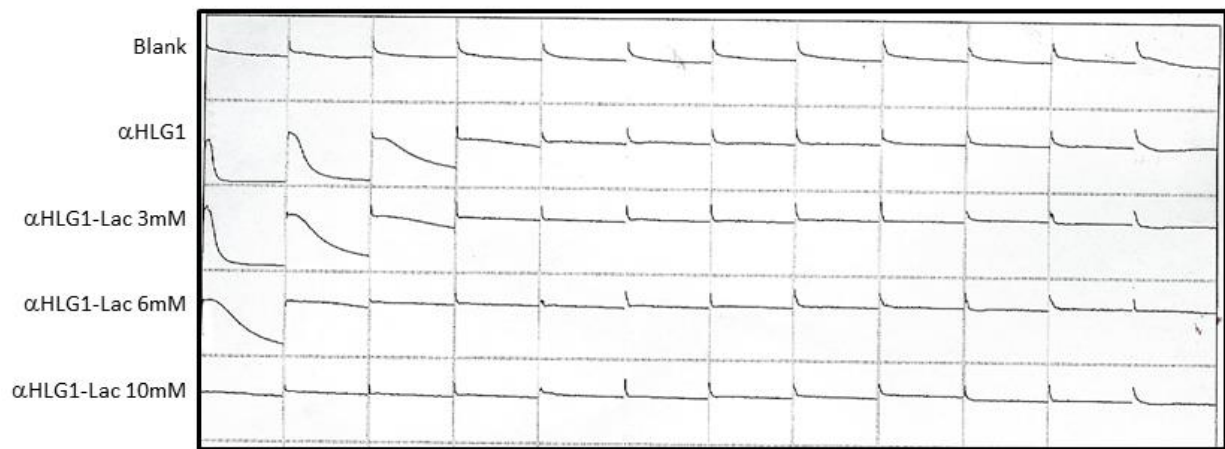

**Figure. S3.** Inhibition assay of  $\alpha$ HLG1 with lactose.  $\alpha$ HLG1 preincubated (20 min) with lactose (3 mM, 6 mM, and 10 mM) was added to the first well of each row and two-fold serially diluted across the row (50  $\mu$ L final volume in each well). The hemolysis assay was initiated by adding 1% hRBC (50  $\mu$ L to each well, 0.5% RBCs final).

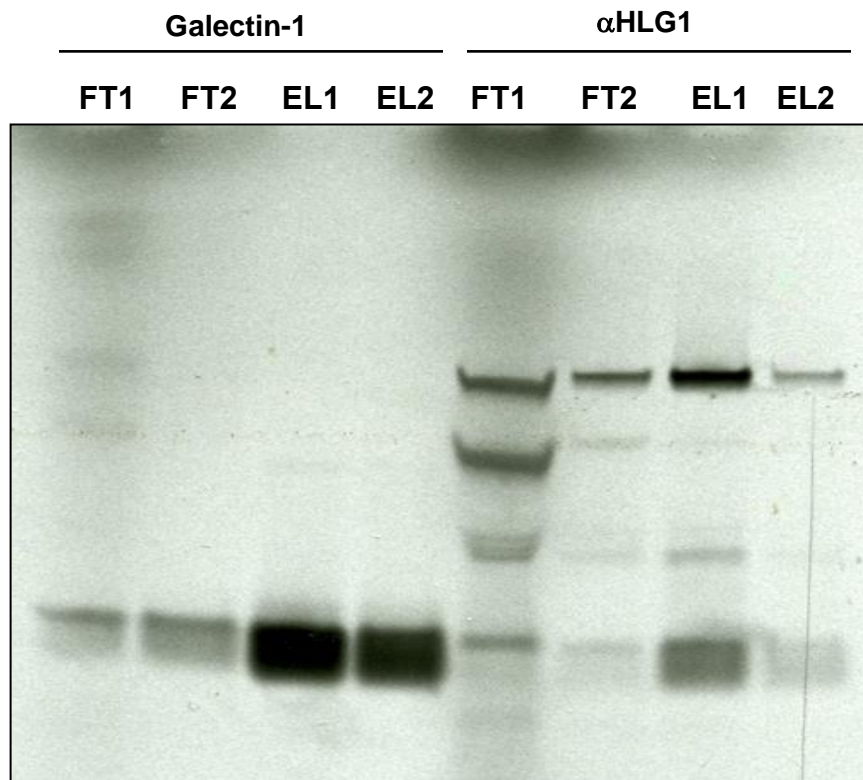

**Figure. S4.** Binding study of galectin-1 and  $\alpha$ HLG1 to  $\beta$ -lactose-agarose column.

Galectin-1 or  $\alpha$ HLG1 synthesized by IVTT was incubated with the  $\beta$ -lactose-agarose resins in a small column (1.5 ml) for 6 h at 4°C. Then the column was centrifuged to obtain the first flow-through. The column was then washed with PBS buffer containing 2 mM of lactose to obtain the second flow-through. Elution buffer containing 10mM of lactose was then added to the column to obtain elution samples. All samples were loaded on 10% SDS-polyacrylamide gel: lane 1, galectin-1 FT-1; lane 2, galectin-1 FT-2; lane 3, galectin-1 EL-1; lane 4, galectin-1 EL-2; lane 5,  $\alpha$ HLG1 FT-1; lane 6,  $\alpha$ HLG1 FT-2; lane 7,  $\alpha$ HLG1 EL-1; lane 8,  $\alpha$ HLG1 EL-2. FT, flow through and EL, elution

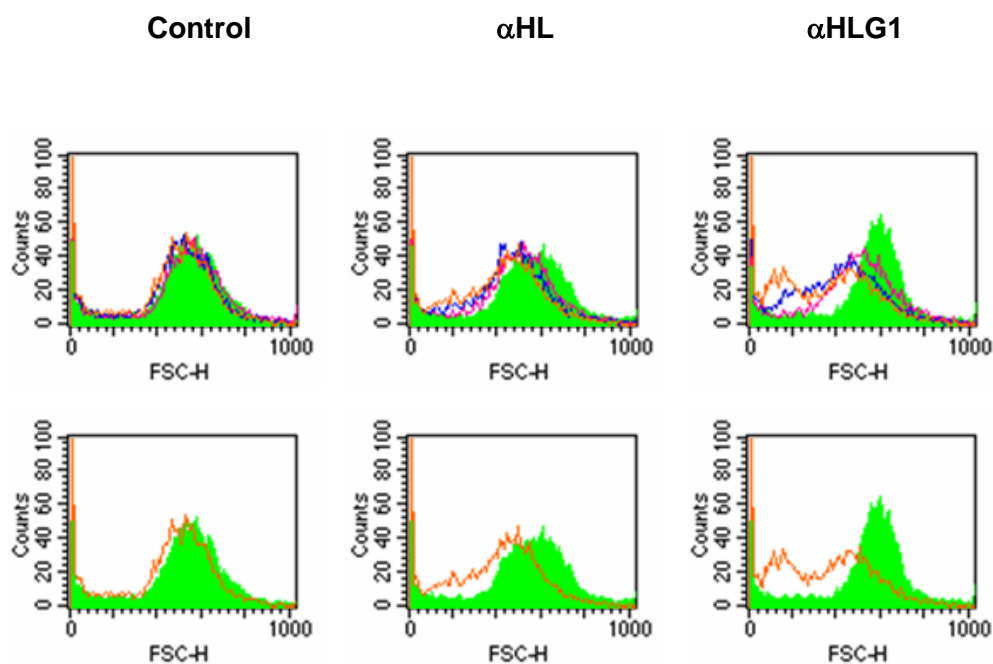

**Figure. S5.** Lysis assay with flow cytometer (raw data of Fig. 4A). Using flow cytometer (parameters: FSC and SSC), cytotoxicity of toxin ( $\alpha$ HL or  $\alpha$ HLG1) toward HL-60 cells were monitored at every 5 min for 75 min. Top: Lytic activity are shown at the time points (green: 0 min; pink: 25 min; blue: 45 min; orange: 75 min.). Bottom: Lytic activities were shown at 0 min (green) and 75 min (orange). PBS-washed HL-60 cells were incubated with assay mix ( $\alpha$ HL or  $\alpha$ HLG1, 19 nM; IMDM containing 3% FBS) and very gently agitated before the reading on FACS.



CATATGGCAGATTCTGATATTAATATTTAAAACCGGTACTACAGATATTGGAAGCAATACT

*NdeI*

ACAGTAAAAACAGGTGATTTAGTCACTTATGATAAAGAAAATGGCATGCACAAAAAAGTATTTTATA  
GTTTTATCGATGATAAAAATCACAATAAAAAACTGCTAGTTATTAGAACAAAAGGTACCATTGCTGG  
TCAATATAGAGTTTATAGCGAAGAAGGTGCTAACAAAAGTGGTTTAGCCTGGCCTTCAGCCTTTAAG  
GTACAGTTGCAACTACCTGATAATGAAGTAGCTCAAATATCTGATTACTATCCGCGGAATTTCGATTG  
ATACAAAAGAGTATATGAGTACGTTAACGTATGGATTCAACGGTAATGTTACTGGTGATGATACAGG  
AAAAATTGGAGGCCTTATTGGTGCAAATGTTTCGATTGGTCATACACTTAAGTATGTTCAACCTGAT  
TTCAAAACAATTTTAGAGAGCCCAACTGATAAAAAAGTAGGCTGGAAAGTGATATTTAACAATATGG  
TGAATCAAATTTGGGACCATACGATCGAGATTCTTGAACCCGGTATATGGCAATCAACTTTTCAT  
GAAAAGTAGAAATGGTTCATGAAAGCAGCAGATAACTTCCTTGATCCTAACAAAGCAAGTTCTCTA  
TTATCTTCAGGGTTTTCCACCAGACTTCGCTACAGTTATTACTATGGATAGAAAAGCATCCAAACAAC  
AAACAAATATAGATGTAATATACGAACGAGTTCGTGATGATTACCAATTGCATTGGACTTCAACAAA  
TTGGAAAGGTACCAATACTAAAGATAAATGGACAGATCGTTCTTCAGAAAGATATAAAATCGATTGG  
GAAAAAGAAGAAATGACAAATACTAGTAGCGGATCGTCCAGAAGAGGTGGGCCCGCAGCGGCTCTTC

*SpeI*

*EarI*

*ApaI*

*EarI*

CAGTTCGGGACACCACCATCACCACCATTGATAAAGCTT

*HindIII*

**Figure. S6.** DNA sequence of  $\alpha$ HL-CTEx-ESA to generate  $\alpha$ HL-galectin-1 chimera.
